# Supplementary material for: Hypoxia-induced Downregulation of SRC-3 Suppresses Trophoblastic Invasion and Migration Through Inhibition of the AKT/mTOR Pathway: Implications for the Pathogenesis of Preeclampsia
Source: PubMed Central journal article supplement (PMC6637123; doi:10.1038/s41598-019-46699-3), 2019-07-17
Supplement: 41598_2019_46699_MOESM1_ESM.pdf [file 41598_2019_46699_MOESM1_ESM.pdf]

# **Hypoxia-induced Downregulation of SRC-3 Suppresses Trophoblastic Invasion and Migration Through Inhibition of the AKT/mTOR Pathway: Implications for the Pathogenesis of Preeclampsia**

Chengjin He<sup>1,2,3#</sup>, Nan Shan<sup>1,2,3#</sup>, Ping Xu<sup>1,2,3</sup>, Huisheng Ge<sup>1,2,3</sup>, Yu Yuan<sup>1,2,3</sup>, Yangming Liu<sup>1,2,3</sup>, Pu Zhang<sup>4</sup>, Li Wen<sup>1,2,3</sup>, Fumei Zhang<sup>1,2,3</sup>, Liling Xiong<sup>1,2,3</sup>, Chuan Peng<sup>3</sup>, Hongbo Qi<sup>1,2,3\*</sup>, Chao Tong<sup>1,2,3\*</sup>, Philip N. Baker<sup>2,5,6</sup>

<sup>1</sup> Department of Obstetrics, The First Affiliated Hospital of Chongqing Medical University, Chongqing 400016, China;

<sup>2</sup> International Collaborative Joint Laboratory of Reproduction and Development, Ministry of Education of China, Chongqing Medical University, Chongqing 400016, China;

<sup>3</sup> State Key Laboratory of Maternal and Fetal Medicine of Chongqing Municipality, The First Affiliated Hospital of Chongqing Medical University, Chongqing 400016, China;

<sup>4</sup> College of Pharmacy, Chongqing Medical University, Chongqing 400016, China

<sup>5</sup> Liggins Institute, University of Auckland, Auckland 1142, New Zealand;

<sup>6</sup> College of Medicine, Biological Sciences and Psychology, University of Leicester, Leicester LE1 7RH, UK.

# These authors contributed equally to this work.

\*Correspondence to Prof. Chao Tong and Prof. Hongbo Qi.

Address: Department of Obstetrics, The First Affiliated Hospital of Chongqing Medical University, 1 Youyi Road, Yuzhong District, Chongqing 400016, China

Tel: +86 23 89011101 (H.Q); +86 23 89011865 (C.T).

Fax: +86 23 89011102 (H.Q); +86 23 89011791(C.T);

Email: chaotongcqmu@163.com (C.T); qihongbo728@163.com (H.Q)

## Supplementary Figures



Fig. S1. Full-length blots of SRC-3 in Fig.1B.



Fig. S2. Full-length blots of  $\beta$ -actin in Fig.1B.



Fig. S3. Full-length blots of p-AKT<sup>ser473</sup> in Fig.1C.



Fig. S4. Full-length blots of t-AKT in Fig.1C.



Fig. S5. Full-length blots of p-mTOR<sup>ser2448</sup> in Fig.1C.



Fig. S6. Full-length blots of t-mTOR in Fig.1C.



Fig. S7. Full-length blots of  $\beta$ -actin in Fig.1C.



Fig. S8. Full-length blots of SRC-3 in Fig.2B.



Fig. S9. Full-length blots of  $\beta$ -actin in Fig.2B.



Fig. S10. Full-length blots of SRC-3 in Fig.3C.



Fig. S11. Full-length blots of p-AKT<sup>ser473</sup> in Fig.3C.



Fig. S12. Full-length blots of t-AKT in Fig.3C.



Fig. S13. Full-length blots of p-mTOR<sup>ser2448</sup> in Fig.3C.



Fig. S14. Full-length blots of t-mTOR in Fig.3C.



Fig. S15. Full-length blots of  $\beta$ -actin in Fig.3C.



Fig. S16. Full-length gels of MMP2 in Fig.3D.



Fig. S17. Full-length blots of SRC-3 (upper panel) in Fig.4B.



Fig. S18. Full-length blots of AKT (upper panel) in Fig.4B.



Fig. S19. Full-length blots of AKT (lower panel) in Fig.4B.



Fig. S20. Full-length blots of SRC-3 (lower panel) in Fig.4B.



Fig. S21. Full-length blots of HIF1- $\alpha$  in Fig.5A.



Fig. S22. Full-length blots of  $\beta$ -actin in Fig.5A.



Fig. S23. Full-length blots of SRC-3 in Fig.5C.



Fig. S24. Full-length blots of p-AKT<sup>ser473</sup> in Fig.5C.



Fig. S25. Full-length blots of t-AKT in Fig.5C.



Fig. S26. Full-length blots of p-mTOR<sup>ser2448</sup> in Fig.5C.



Fig. S27. Full-length blots of t-mTOR in Fig.5C.



Fig. S28. Full-length blots of β-actin in Fig.5C.



Fig. S29. Full-length gels of MMP2 in Fig.5F.
